# Supplementary material for: Maternal high-fat diet exaggerates diet-induced insulin resistance in adult offspring by enhancing inflammasome activation through noncanonical pathway of caspase-11
Source: PubMed Central journal article supplement — Mol Metab. 2020 Apr 6;37:100988. doi: 10.1016/j.molmet.2020.100988 (PMC7210595; doi:10.1016/j.molmet.2020.100988), 2020-04-06
Supplement: mmc3.pdf [file mmc3.pdf]

| genes         | forward                              | reverse                              |
|---------------|--------------------------------------|--------------------------------------|
| F4/80         | 5'-TGCATCTAGCAATGGACAGC-3'           | 5'-GCCTTCTGGATCCATTTGAA-3'           |
| CCL2          | 5'-GGCTCAGCCAGATGCAGTTAA-3'          | 5'-CCTACTCATTGGGATCATCTTGCT-3'       |
| ICAM-1        | 5'-AGCACCTCCCCACCTACTTT-3'           | 5'-AGCTTGCACGACCCTTCTAA-3'           |
| TNF- $\alpha$ | 5'-TCCCAGGTTCTCTTCAAGGGA-3'          | 5'-GGTGAGGAGCACGTAGTCGG-3'           |
| IL-1 $\beta$  | 5'-TTCAGGCAGGCAGTATCACTC-3'          | 5'-GAAGGTCCACGGGAAAGACAC-3'          |
| IL-6          | 5'-ACAACCACGGCCTTCCCTACTT-3'         | 5'-CACGATTTCCAGAGAACATGTG-3'         |
| Adiponectin   | 5'GTTGCAAGCTCTCCTGTTCC-3'            | 5'-TCTCCAGGAGTGCCATCTCT-3'           |
| Leptin        | 5'-GATGACACCAAACCCTCATCAAG-3'        | 5'-GCCACCACCTCTGTGGAGTAG-3'          |
| CEBP $\alpha$ | 5'-TGGACAAGAACAGCAACGAG-3'           | 5'-AATCTCCTAGTCCTGGCTTG-3'           |
| SREBP1        | 5'-GGAAGCTGTGGGGTAGCGTC-3'           | 5'-CATGTCTTCAAATGTGCAATCCAT-3'       |
| iNOS          | 5'-CACCTTGGAGTTCACCCAGT-3'           | 5'-ACCACTCGTACTTGGGATGC-3'           |
| IL-12         | 5'-GGAAGCACGGCAGCAGAATA-3'           | 5'-AACTTGAGGGAGAAGTAGGAATGG-3'       |
| Arg1          | 5'-GTGAAGAACCCACGGTCTGT-3'           | 5'-CTGGTTGTCAGGGGAGTGTT-3'           |
| CD206         | 5'-ATGCCAAGTGGGAAAATCTG-3'           | 5'-TGTAGCAGTGGCCTGCATAG-3'           |
| Fizz1         | 5'-GGTCCCAGTGCATATGGATGAGACCATAGA-3' | 5'-CACCTCTTCACTCGAGGGACAGTTGGCAGC-3' |
| Ym1           | 5'-TCACAGGTCTGGCAATTCTTCTG-3'        | 5'-TTTGTCCCTTAGGAGGGCTTCCTC-3'       |
| GAPDH         | 5'-TGTCCGTCGTGGATCTGAC-3'            | 5'-CCTGCTTCACCACCTTCTTG-3'           |
